# Supplementary material
Source: PubMed Central journal article supplement (PMC2941305)
Supplement: 1005264107_pnas.1005264107_SI.pdf [file 1005264107_pnas.1005264107_SI.pdf]

# Supporting Information

Wang et al. 10.1073/pnas.1005264107

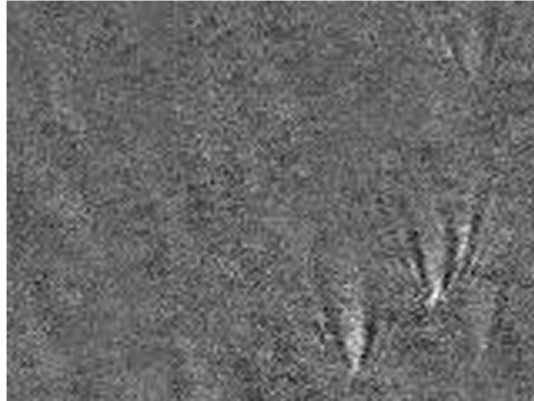

**Movie S1.** SPRM video images of influenza virus in PBS solution attach to bare gold surface. The video was recorded at 380 fps but the playing back rate was reduced to 38 fps for easy visualization.

[Movie S1 \(AVI\)](#)

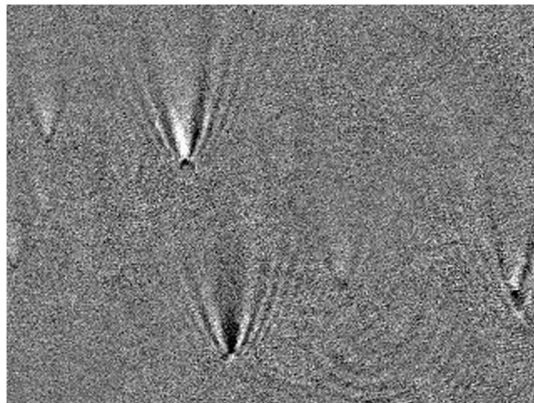

**Movie S2.** SPRM video images of 200 nm Silica nanoparticles in PBS solution and on bare gold surface. The video was recorded at 380 fps and played back at 38 fps.

[Movie S2 \(AVI\)](#)
